# Supplementary material
Source: HighWire-hosted journal article supplement (https://innovations.bmj.com/highwire/filestream/137835/field_highwire_adjunct_files/0/bmjinnov-2020-000526supp001_data_supplement.pdf)
Supplement: bmjinnov-2020-000526supp001_data_supplement.pdf [file bmjinnov-2020-000526supp001_data_supplement.pdf]

## Appendix 1

### Pre-course survey

Which of the following apply to you?

- I am a person with type 2 diabetes
- I am a person at risk of developing type 2 diabetes
- I am a family member or carer of a person with type 2 diabetes
- I am a healthcare professional
- I am none of the above

To what extent do you agree with the following statements?

|                                  | Strongly agree | Agree | Neutral | Disagree | Strongly disagree |
|----------------------------------|----------------|-------|---------|----------|-------------------|
| 'I know enough about my health'* |                |       |         |          |                   |
| 'I manage my diabetes well' *    |                |       |         |          |                   |

\*these questions were only presented to those who had, or were at risk of type 2 diabetes

What would you like the course to help you achieve?

How confident are you in achieving these goals?

- Very confident
- Confident
- Neutral
- Unconfident
- Very unconfident

## Post-course survey

Which of the following apply to you?

- I am a person with type 2 diabetes
- I am a person at risk of developing type 2 diabetes
- I am a family member or carer of a person with type 2 diabetes
- I am a healthcare professional
- I am none of the above

To what extent do you agree with the following statements?

|                                                                                                       | Strongly agree | Agree | Neutral | Disagree | Strongly disagree |
|-------------------------------------------------------------------------------------------------------|----------------|-------|---------|----------|-------------------|
| 'I know enough about my health'*                                                                      |                |       |         |          |                   |
| 'I manage my diabetes well' *                                                                         |                |       |         |          |                   |
| 'I found the course useful'                                                                           |                |       |         |          |                   |
| 'The course had all the information I expected'                                                       |                |       |         |          |                   |
| 'The course was easy to follow'                                                                       |                |       |         |          |                   |
| 'The course improved my knowledge of diabetes'                                                        |                |       |         |          |                   |
| 'The course helped me set my own diabetes goals'*                                                     |                |       |         |          |                   |
| 'The course motivated me to manage my diabetes'*                                                      |                |       |         |          |                   |
| 'The course will help me achieve my diabetes goals'*                                                  |                |       |         |          |                   |
| 'The course will improve my confidence around managing diabetes'*                                     |                |       |         |          |                   |
| 'I will change the way I manage diabetes as a result of this course'*                                 |                |       |         |          |                   |
| 'The course has improved my overall health and wellbeing'*                                            |                |       |         |          |                   |
| 'My learning was enhanced by sharing information and hearing stories from other people with diabetes' |                |       |         |          |                   |

\*these questions were only presented to those who had, or were at risk of type 2 diabetes

**Is there anything you found particularly enjoyable or useful in this course?**

**Is there anything you feel would have improved the course?**

**Did you have any difficulty accessing the site or resources?**
